# Supplementary material for: A full-adder based on reconfigurable DNA-hairpin inputs and DNAzyme computing modules
Source: Royal Society of Chemistry journal article supplement (doi:10.1039/c4sc00914b), 2014-04-24
Supplement: c4sc00914b1.pdf [file c4sc00914b1.pdf]

**Figure S1.** Gel electrophoresis analysis of the inter-input interactions and the formation of supramolecular structures of the inputs.

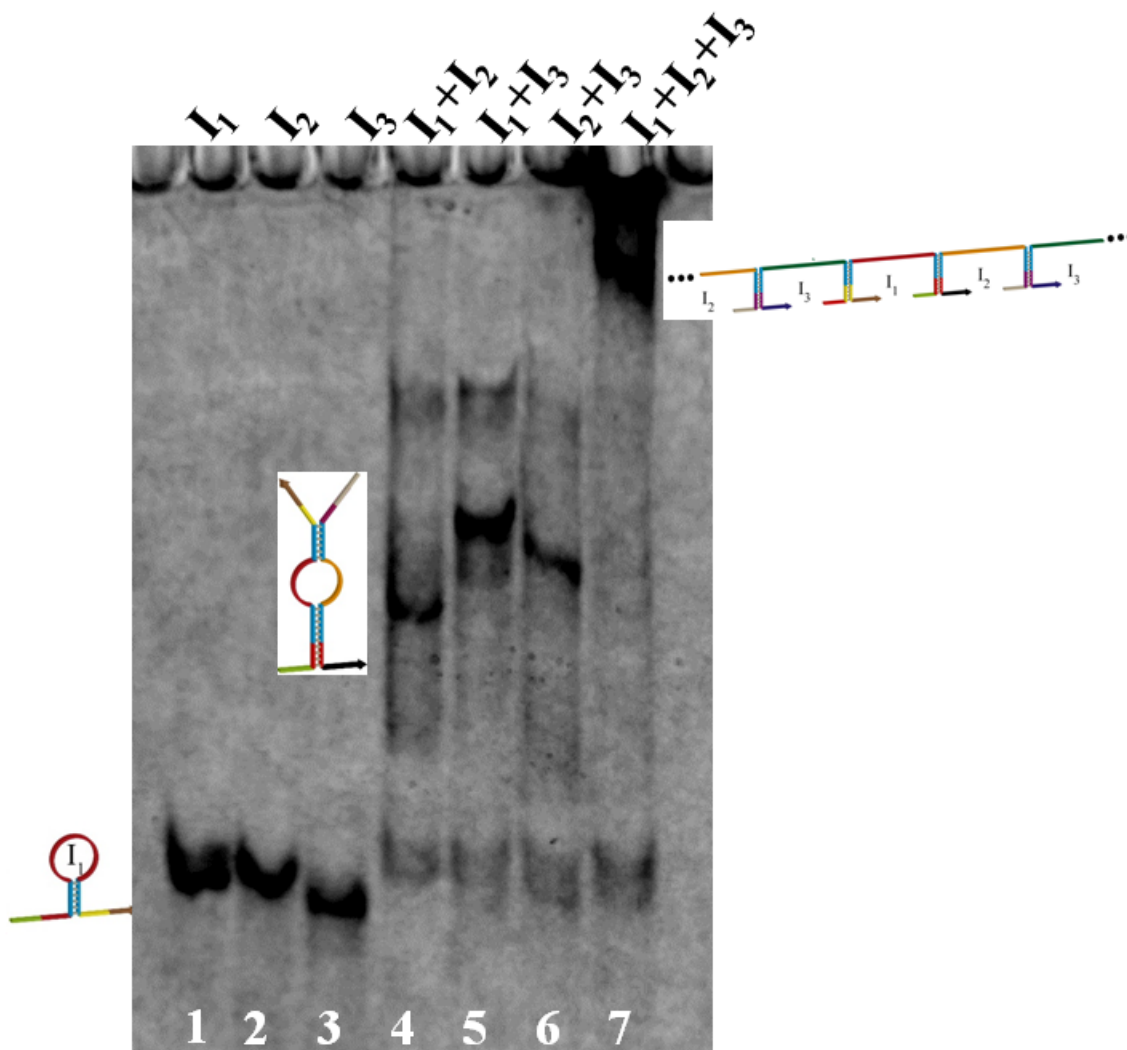

Figure S1 examines the inter-input interactions and the formation of the respective supramolecular structures. In lanes 1-3 the electrophoretic migration of the individual inputs,  $I_1$ ,  $I_2$  and  $I_3$  are presented. In lanes 4-6 the bands corresponding to the electrophoretic migration of mixtures of the  $I_1+I_2$ ;  $I_1+I_3$ ;  $I_2+I_3$  are presented. Besides residues of the free input strands, bands corresponding to slower migrating DNA structures are observed, consistent with the formation of bi-loop structures of the inputs. In lane 7, the electrophoretic migration of the mixture consisting of  $I_1+I_2+I_3$  is displayed. A broad very slow migrating band corresponding to a high-molecular-weight product is observed, consistent with the formation of polymeric wires consisting of the three inputs.
